# Supplementary material
Source: publisher figshare collection journal article supplement (https://sage.figshare.com/ndownloader/files/13993319)
Supplement: Supplementary file 1 [file 13993319]

**Table 13.** Histomorphologic Observations in Hematopoietic/Lymphoid Organs of CByB6F1 and CD-1 Mice (Study 1)

| **Group** | **1** | | **2** | | **3** | | **4** | | **5** | | **6** | | **7** | | **8** | | **9** | | **10** | |
| --- | --- | --- | --- | --- | --- | --- | --- | --- | --- | --- | --- | --- | --- | --- | --- | --- | --- | --- | --- | --- |
| **Treatment** | **Saline Control** | | | | **ISIS 487660** | | | | **ISIS 420476** | | | | **ISIS 104838** | | | | **ISIS 421856** | | | |
| **Strain** | **CByB6F1** | | **CD-1** | | **CByB6F1** | | **CD-1** | | **CByB6F1** | | **CD-1** | | **CByB6F1** | | **CD-1** | | **CByB6F1** | | **CD-1** | |
| **Sex** | **M** | **F** | **M** | **F** | **M** | **F** | **M** | **F** | **M** | **F** | **M** | **F** | **M** | **F** | **M** | **F** | **M** | **F** | **M** | **F** |
| **No. Examined** | **10** | **10** | **10** | **10** | **10** | **10** | **10** | **10** | **10** | **10** | **10** | **10** | **10** | **10** | **10** | **10** | **10** | **10** | **10** | **10** |
| **Spleen** |  |  |  |  |  |  |  |  |  |  |  |  |  |  |  |  |  |  |  |  |
| Cellularity, increased, hematopoietic | 0 | 0 | 0 | 0 | 10 | 7 | 5 | 5 | 4 | 5 | 6 | 1 | 4 | 0 | 6 | 6 | 10 | 10 | 9 | 8 |
| -minimal | 0 | 0 | 0 | 0 | 8 | 7 | 5 | 5 | 4 | 5 | 5 | 1 | 4 | 0 | 6 | 6 | 0 | 0 | 3 | 2 |
| -mild | 0 | 0 | 0 | 0 | 2 | 0 | 0 | 0 | 0 | 0 | 1 | 0 | 0 | 0 | 0 | 0 | 2 | 8 | 6 | 4 |
| -moderate | 0 | 0 | 0 | 0 | 0 | 0 | 0 | 0 | 0 | 0 | 0 | 0 | 0 | 0 | 0 | 0 | 8 | 2 | 0 | 2 |
| Hyperplasia, lymphoid, generalized | 0 | 0 | 0 | 0 | 0 | 0 | 1 | 0 | 0 | 0 | 0 | 0 | 1 | 0 | 0 | 0 | 10 | 10 | 10 | 8 |
| -minimal | 0 | 0 | 0 | 0 | 0 | 0 | 1 | 0 | 0 | 0 | 0 | 0 | 1 | 0 | 0 | 0 | 0 | 2 | 4 | 2 |
| -mild | 0 | 0 | 0 | 0 | 0 | 0 | 0 | 0 | 0 | 0 | 0 | 0 | 0 | 0 | 0 | 0 | 9 | 8 | 6 | 6 |
| -moderate | 0 | 0 | 0 | 0 | 0 | 0 | 0 | 0 | 0 | 0 | 0 | 0 | 0 | 0 | 0 | 0 | 1 | 0 | 0 | 0 |
| Macrophages, vacuolated/granular |  |  |  |  |  |  |  |  |  |  |  |  |  |  |  |  |  |  |  |  |
| -minimal | 0 | 0 | 0 | 0 | 10 | 10 | 10 | 9 | 10 | 10 | 10 | 10 | 10 | 10 | 10 | 10 | 10 | 10 | 10 | 9 |
| **Lymph node, mesenteric** |  |  |  |  |  |  |  |  |  |  |  |  |  |  |  |  |  |  |  |  |
| Macrophages, vacuolated/granular | 0 | 0 | 0 | 0 | 10 | 10 | 10 | 10 | 10 | 10 | 10 | 10 | 10 | 10 | 10 | 10 | 10 | 10 | 10 | 10 |
| -minimal | 0 | 0 | 0 | 0 | 0 | 0 | 1 | 0 | 0 | 0 | 0 | 0 | 0 | 7 | 0 | 0 | 0 | 0 | 0 | 0 |
| -mild | 0 | 0 | 0 | 0 | 4 | 8 | 7 | 7 | 10 | 8 | 8 | 9 | 8 | 3 | 6 | 8 | 0 | 2 | 2 | 3 |
| -moderate | 0 | 0 | 0 | 0 | 6 | 2 | 2 | 3 | 0 | 2 | 2 | 1 | 2 | 0 | 4 | 2 | 7 | 8 | 7 | 6 |
| -severe | 0 | 0 | 0 | 0 | 0 | 0 | 0 | 0 | 0 | 0 | 0 | 0 | 0 | 0 | 0 | 0 | 3 | 0 | 1 | 1 |
| Hyperplasia, lymphoid, generalized | 0 | 0 | 0 | 0 | 0 | 0 | 0 | 0 | 0 | 1 | 0 | 0 | 0 | 0 | 0 | 0 | 1 | 7 | 4 | 1 |
| -minimal | 0 | 0 | 0 | 0 | 0 | 0 | 0 | 0 | 0 | 1 | 0 | 0 | 0 | 0 | 0 | 0 | 1 | 2 | 4 | 1 |
| -mild | 0 | 0 | 0 | 0 | 0 | 0 | 0 | 0 | 0 | 0 | 0 | 0 | 0 | 0 | 0 | 0 | 0 | 5 | 0 | 0 |
| Hematopoiesis, extramedullary |  |  |  |  |  |  |  |  |  |  |  |  |  |  |  |  |  |  |  |  |
| -minimal | 0 | 0 | 0 | 0 | 0 | 0 | 0 | 1 | 0 | 1 | 0 | 0 | 0 | 0 | 2 | 0 | 0 | 1 | 3 | 4 |
| **Bone marrow, femur** |  |  |  |  |  |  |  |  |  |  |  |  |  |  |  |  |  |  |  |  |
| Myeloid/erythroid ratio, increased | 0 | 0 | 0 | 0 | 0 | 0 | 0 | 0 | 0 | 0 | 1 | 0 | 0 | 0 | 0 | 0 | 0 | 1 | 5 | 3 |
| -minimal | 0 | 0 | 0 | 0 | 0 | 0 | 0 | 0 | 0 | 0 | 0 | 0 | 0 | 0 | 0 | 0 | 0 | 1 | 4 | 3 |
| -mild | 0 | 0 | 0 | 0 | 0 | 0 | 0 | 0 | 0 | 0 | 1 | 0 | 0 | 0 | 0 | 0 | 0 | 0 | 1 | 0 |
| Macrophages, vacuolated/granular |  |  |  |  |  |  |  |  |  |  |  |  |  |  |  |  |  |  |  |  |
| -minimal | 0 | 0 | 0 | 0 | 10 | 10 | 10 | 9 | 10 | 10 | 10 | 10 | 10 | 9 | 10 | 10 | 10 | 8 | 10 | 6 |
| M-Male; F-Female | | | | | | | | |  | | | | | | | | | | | |
